# Supplementary material
Source: PubMed Central journal article supplement (PMC6119135)
Supplement: 2017_185751-Disclosures_and_Contributions.pdf [file 2017_185751-Disclosures_and_Contributions.pdf]

Haematologica  
HAEMATOL/2017/185751  
Version 4

Value of cytogenetic abnormalities in post-polycythemia vera and  
post-essential thrombocythemia myelofibrosis: a study of the MYSEC  
project

Barbara Mora, Toni Giorgino, Paola Guglielmelli, Elisa Rumi,  
Margherita Maffioli, Alessandro Rambaldi, Marianna Caramella, Rami  
Komrokji, Jason Gotlib, Jean-Jacques Kiladjian, Francisco Cervantes,  
Timothy Devos, Francesca Palandri, Valerio De Stefano, Marco  
Ruggeri, Richard T. Silver, Giulia Benevolo, Francesco Albano, Chiara  
Cavalloni, Daniela Barraco, Michele Merli, Daniela Pietra, Rosario  
Casalone, Tiziano Barbui, Giada Rotunno, Mario Cazzola, Alessandro  
Maria Vannucchi, and Francesco Passamonti

Disclosures: Nothing to disclose

Contributions: Contribution: F.P, B.M, A.M.V, M.M. contributed to the conception of the work; F.P, B.M, T.G. contributed to the design of the work; T.G. performed the statistical analysis; B.M., F.P., P.G., M.C., M.M., A.R., M.C., R.K., J.G., J.J.K., F.C., T.D., F.P., V.DS., M.R., R.T.S., G.B., F.A., A.S., E.R., M.Me., D.P., T.B., A.B., G.R., A.M.V. contributed to the acquisition, analysis, or interpretation of data for the work; B.M., F.P., T.G., P.G., M.C., M.M., A.R., M.C., R.K., J.G., J.J.K., F.C., T.D., F.P., V.DS., M.R., R.T.S., G.B., F.A., D.B., E.R., M.Me., D.P., T.B., A.B., G.R., A.M.V. contributed to revising the manuscript critically for important intellectual content and approved the final version of the manuscript.
